# Supplementary material for: Public Policy Measures to Increase Anti-SARS-CoV-2 Vaccination Rate in Russia
Source: MDPI journal article supplement (doi:10.3390/ijerph19063387), 2022-03-13
Supplement: s1 [file s1]

## **Questionnaire**

(translated from Russian into English)

1. What are your attitudes regarding vaccination against COVID-19?

[response as a text]

2. Do you regard yourself a person with confirmed anti-vaccination attitude regarding different diseases?

[YES/NO]

3. If you are cautious about vaccination against COVID-19, please list your reasons (any number of reasons):

[response as a text]

4. If any foreign vaccines against COVID-19 were available in Russia, would you prefer them?

[YES/NO/DIFFICULT TO SAY]

5. Are you aware about the forthcoming introduction of nation-wide system of vaccination certification / verification based on QR codes?

[YES/NO]

6. If YES (Query 5), do you support this initiative?

[YES/NO/DIFFICULT TO SAY]

7. If YES (Query 5), please list your reasons (any number of reasons):

[response as a text]

8. Are you already vaccinated against COVID-19?

[YES/NO]

9. Do you think anti-COVID vaccination should be... (please continue)

[VOLUNTARY/COMPULSORY/DIFFICULT TO SAY]
